# Supplementary material for: Magnetic-Core/Gold-Shell Nanoparticles for the Detection of Hydrophobic Chemical Contaminants
Source: MDPI journal article supplement (doi:10.3390/nano12081253), 2022-04-07
Supplement: s1 [file s1]

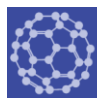

Supporting Information

# Magnetic-Core/Gold-Shell Nanoparticles for the Detection of Hydrophobic Chemical Contaminants

Anna M. Mills <sup>1,2</sup>, Joseph Strzalka <sup>3</sup>, Andrea Bernat <sup>4</sup>, Qinchun Rao <sup>4</sup> and Daniel T. Hallinan Jr. <sup>1,2,\*</sup>

<sup>1</sup> Chemical and Biomedical Engineering Department, Florida A&M University-Florida State University College of Engineering, Tallahassee, FL 32310, USA; amm15s@fsu.edu;

<sup>2</sup> Aero-propulsion, Mechatronics, and Energy Center, Florida State University, Tallahassee, FL 32310, USA

<sup>3</sup> Argonne National Laboratory, X-ray Science Division, Lemont, IL 60439, USA; strzalka@anl.gov

<sup>4</sup> Department of Nutrition and Integrative Physiology, Florida State University, Tallahassee, FL 32306, USA; asb13v@my.fsu.edu (A.B.); qrhao@fsu.edu (Q.R.)

\* Correspondence: dhallinan@eng.famu.fsu.edu; Tel.: +1-850-645-0131

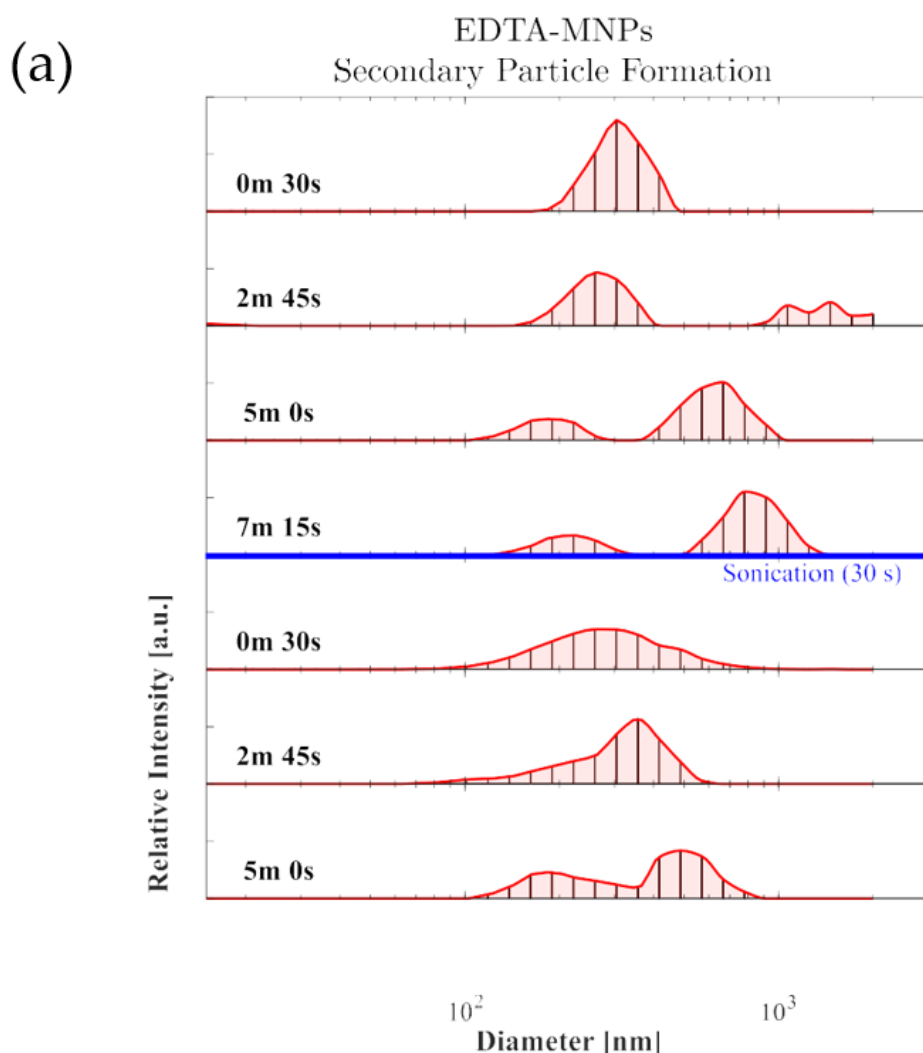

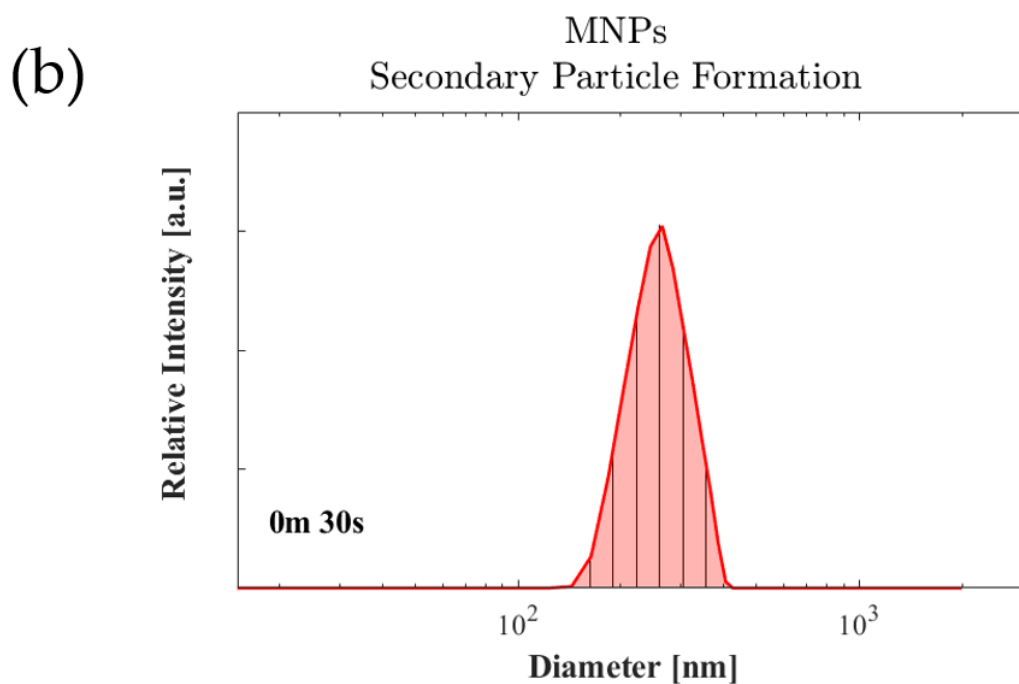

**Figure S1.** (a) Secondary particles begin to form very soon after sonication, but additional sonication re-disperses the particles and breaks up agglomerated EDTA-MNPs. (b) Uncapped MNPs appear larger than what is observed in TEM.

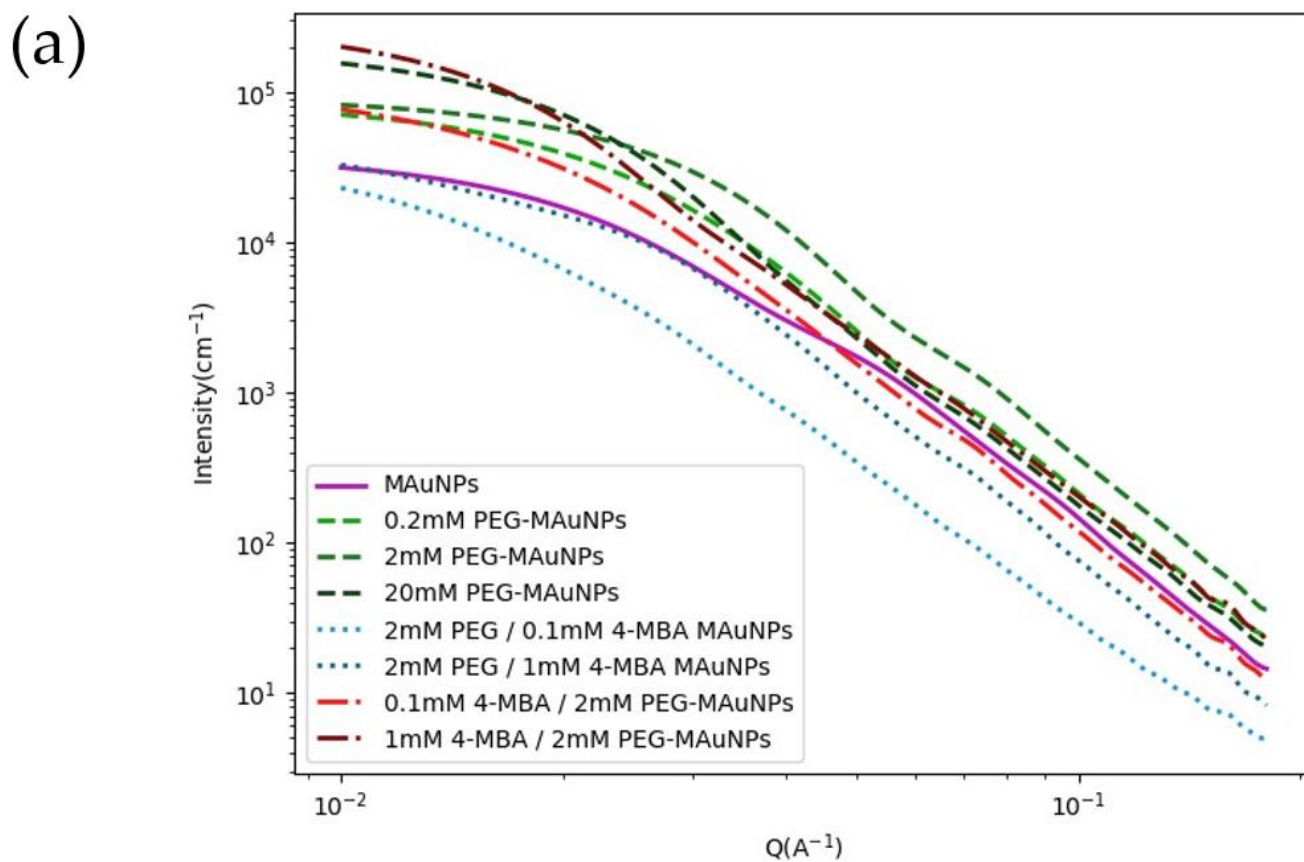

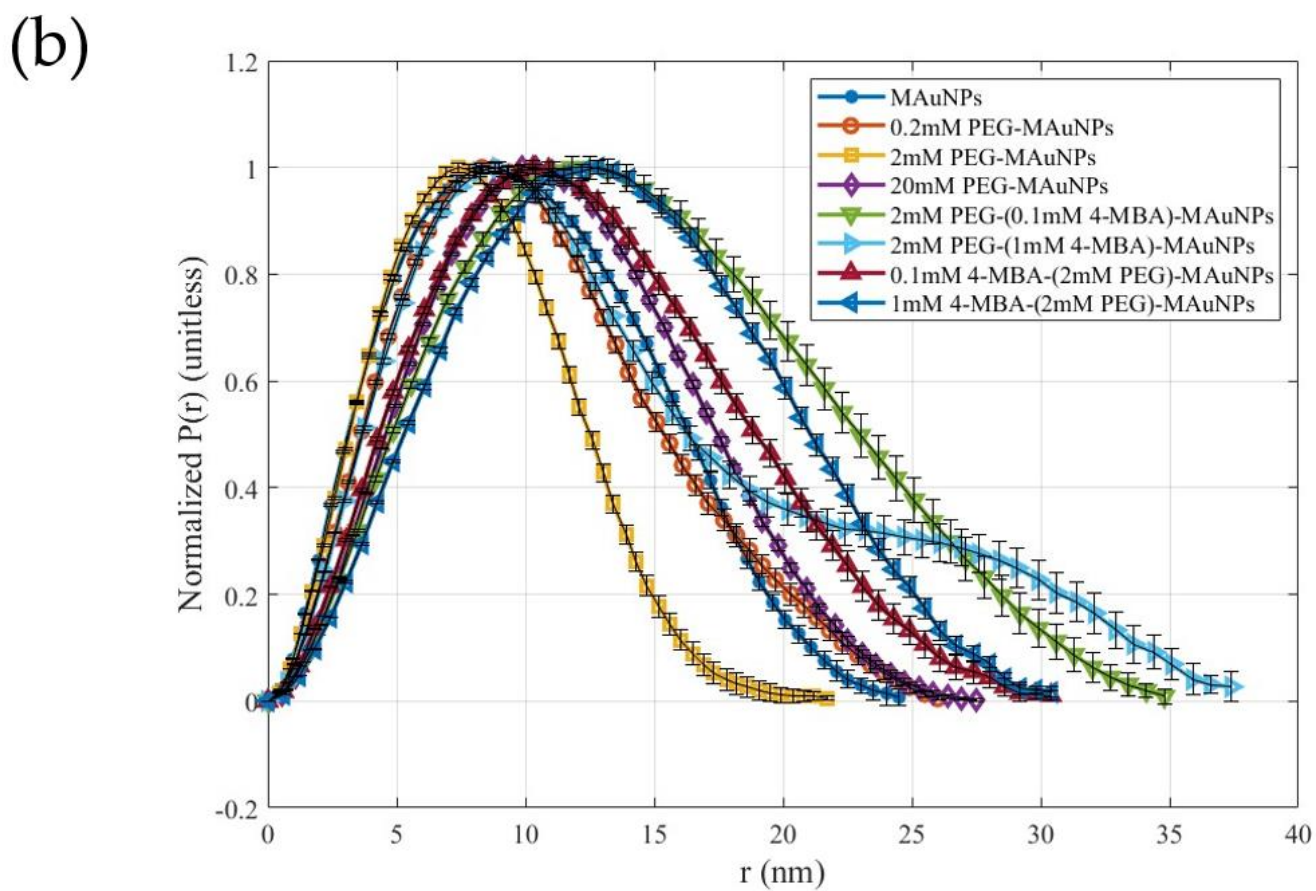

**Figure S2.** (a) Raw 1-D scattering data used to determine  $P(r)$ . (b) Simulated  $P(r)$  fits were determined using SASView and normalized to a peak value of 1.

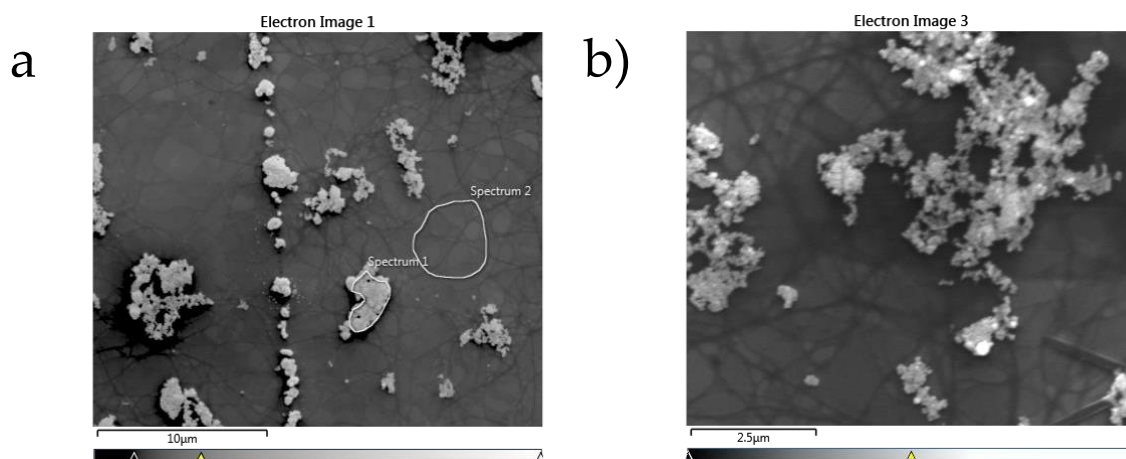

**Figure S3.** SEM micrographs of drop-cast (a) MAuNPs and (b) 0.2 mM PEG-MAuNPs.

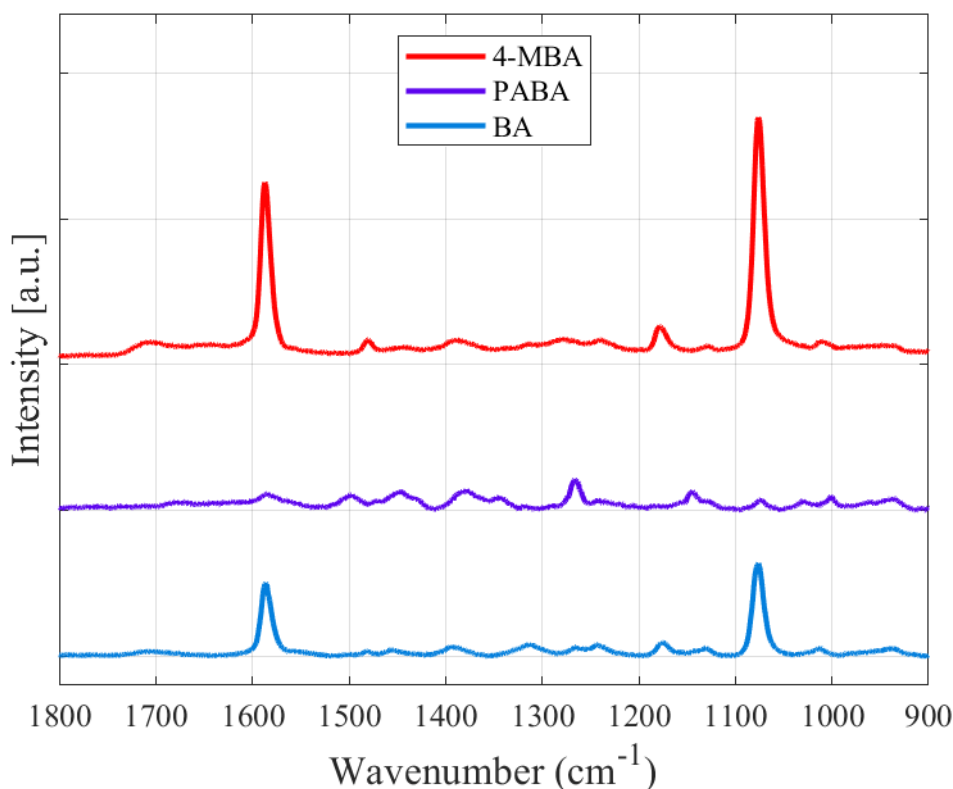

**Figure S4.** MAuNPs can be used to detect 4-MBA, PABA, and BA.

#### Concentration Determination

An aliquot of 1 vol% of the as-synthesized MAuNP solution was diluted to 0.1 vol% or 0.01 vol%. UV-vis was performed using 1 cm cuvettes, and the peak absorbance was recorded. Molar concentration was then calculated using the Beer-Lambert law (Equation (S1))

$$A = \epsilon Lc \quad (\text{S1})$$

where  $A$  is the absorbance,  $\epsilon$  is the molar attenuation coefficient,  $L$  is the path length, and  $c$  is the molar concentration.  $L$  was taken to be 1 cm, and  $\epsilon$  was taken to be  $3.36 \times 10^9 \text{ M}^{-1}\text{cm}^{-1}$ .

#### Theoretical Mass Concentration Calculation

Using the bulk densities of Au and  $\text{Fe}_2\text{O}_3$  and the nanoparticle dimensions as determined by TEM, the theoretical mass concentration was determined.

$$\rho_{\text{Fe}_2\text{O}_3} = 5.24 \text{ g/cm}^3$$

$$\rho_{\text{Au}} = 19.3 \text{ g/cm}^3$$

$$D_{\text{MNP}} = 10.8 \text{ nm}$$

$$D_{\text{MAuNP}} = 27.2 \text{ nm}$$

The nanoparticle number density,  $\rho_N$ , was calculated by multiplying the molar concentration,  $M$ , by Avogadro's number,  $N_A$ .

$$\rho_N = M \cdot N_A$$

The mass of the MNP,  $m_{\text{MNP}}$ , was calculated by assuming a spherical geometry.

$$m_{MNP} = \rho_{Fe_2O_3} \cdot \frac{4\pi}{3 \left(\frac{D_{MNP}}{2}\right)^3}$$

The mass of the Au in the MAuNP,  $m_{AuNP}$ , was also calculated by assuming a spherical geometry.

$$m_{AuNP} = \rho_{Au} \cdot \left( \frac{4\pi}{3 \left(\frac{D_{MAuNP}}{2}\right)^3} - \frac{4\pi}{3 \left(\frac{D_{MNP}}{2}\right)^3} \right)$$

The total mass of one MAuNP,  $m_{MAuNP}$ , was taken to be the sum of the masses of the core and the shell.

$$m_{MAuNP} = m_{MNP} + m_{AuNP}$$

Finally, the mass concentration of the nanoparticle dispersion,  $c_{MAuNPs}$ , was calculated with the following equation.

$$c_{MAuNPs} = m_{MAuNP} \cdot \rho_N$$

#### NMR Sample Preparation

PEG-MAuNPs were synthesized, and 500  $\mu$ L of concentrated PEG-MAuNP dispersion was collected. This dispersion was split evenly between a centrifuge tube and a microcentrifuge tube. The sample in the centrifuge tube was centrifugally rinsed three times with 3 mL D<sub>2</sub>O (3,200 rpm for 5 min). 100  $\mu$ L of the solution was collected and added with 390  $\mu$ L D<sub>2</sub>O and 10  $\mu$ L 0.124 M pyridine in a 5 mm NMR tube. The sample in the microcentrifuge tube was dried under air, added with 100  $\mu$ L chloroform and 1 mL 0.1 mM 4-MBA and sonicated for 30 s to re-disperse the PEG-MAuNPs in the incubation solution. After the 24-hour incubation period, the sample was centrifugally rinsed three times with 3 mL chloroform (3,200 rpm for 5 min). 100  $\mu$ L PEG-(4-MBA)-MAuNP dispersion was extracted and subsequently dried under air. The sample was then re-dispersed in 100  $\mu$ L D<sub>2</sub>O using 30 s sonication. The sample was then added with 470  $\mu$ L D<sub>2</sub>O and 10  $\mu$ L 0.124 M pyridine in an NMR tube.

(4-MBA)-MAuNPs were prepared in 0.1 mM 4-MBA and rinsed with chloroform as described previously. 180  $\mu$ L concentrated dispersion was extracted and split evenly between two microcentrifuge tubes. The sample in the first microcentrifuge tube was dried in air, re-dispersed in 2 mL D<sub>2</sub>O (via 30 s sonication), and centrifugally rinsed three times with D<sub>2</sub>O (3,200 rpm for 10 min). 35  $\mu$ L concentrated (4-MBA)-MAuNP dispersion was extracted and added with 455  $\mu$ L D<sub>2</sub>O and 10  $\mu$ L 0.124 M pyridine in an NMR tube. The sample in the second microcentrifuge tube was dried in air, re-dispersed in 90  $\mu$ L DI water (via 30 s sonication), and centrifugally rinsed three times with DI water. 20  $\mu$ L concentrated (4-MBA)-MAuNP dispersion was extracted and added with 2 mL of 2 mM PEG. This solution was left stirring overnight. The sample was then rinsed centrifugally three times with 3 mL D<sub>2</sub>O (3,200 rpm for 5 min). 60  $\mu$ L concentrated (4-MBA)-PEG-MAuNP dispersion was extracted and added with 430  $\mu$ L D<sub>2</sub>O and 10  $\mu$ L 0.124 M pyridine in an NMR tube.

#### Supporting Information References

1. Liu, X.; Atwater, M.; Wang, J.; Huo, Q., Extinction coefficient of gold nanoparticles with different sizes and different capping ligands. *Colloids Surf. B Biointerfaces* **2007**, *58*, 3-7.
